# Supplementary material
Source: PubMed Central journal article supplement (PMC5931715)
Supplement: NIHMS908139-supplement-Appendix_Figure_A1.pdf [file NIHMS908139-supplement-Appendix_Figure_A1.pdf]

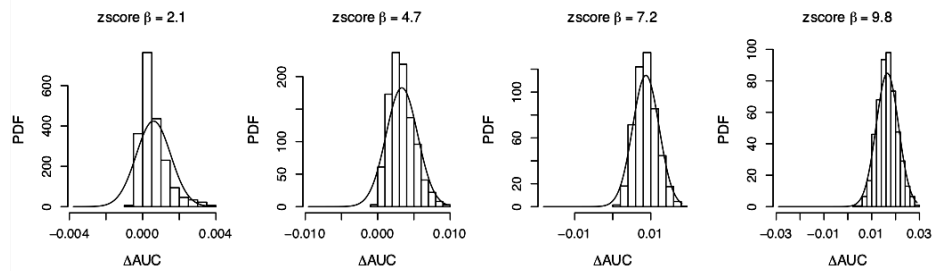

**Figure A1.** Transition of  $\Delta AUC$  from degeneracy to non-degeneracy. Framingham Heart Study data. Reduced model included predictor variables: age, hdl and total cholesterol, systolic blood pressure, smoking and diabetes status. Full model = reduced model+diastolic blood pressure (dpf). We artificially varied the strength of added dpf variable. Strength is measured by  $z\text{-score}(\beta_{dpf}) = \beta_{dpf}/se(\beta_{dpf})$ .
